# Supplementary material for: Aluminum phosphate sludge as a phosphorus source for maize production under low soil phosphorus availability
Source: PeerJ. 2022 Aug 17;10:e13885. doi: 10.7717/peerj.13885 (PMC9392449; doi:10.7717/peerj.13885)
Supplement: Supplemental Information 1 [file peerj-10-13885-s001.xlsx]

## Sheet: BiomassYield 1-4 
SN	Cycle	Rep	Trt	Rate (mg_kgsoil)	Puptake_mg_kgsoil	Yield_mg_kgsoil	Puptake in Control (mg_kgsoil)	P in Manure (mg_kgsoil)	PRE
1	1	1	Control	0	5.32559	2432.99
2	1	1	Sludge	9.7	11.9104	11085.9	5.32559	9.7	67.8849
3	1	1	Sludge	19.4	14.5103	12522.3	5.32559	19.4	47.3436
4	1	1	Sludge	29.1	13.6422	11773.2	5.32559	29.1	28.5794
5	1	1	Sludge	38.8	17.6036	12721.6	5.32559	38.8	31.6443
6	1	1	MAP	9.7	6.31856	8247.42	5.32559	9.7	0.958391
7	1	1	MAP	19.4	8.44796	9972.51	5.32559	19.4	16.0947
8	1	1	MAP	29.1	8.22586	9608.25	5.32559	29.1	7.56106
9	1	1	MAP	38.8	9.75346	11230.2	5.32559	38.8	11.412
10	1	2	Control	0	5.08494	2728.52
11	1	2	Sludge	9.7	10.9032	9230.24	5.08494	9.7	59.9823
12	1	2	Sludge	19.4	12.6952	11718.2	5.08494	19.4	39.2283
13	1	2	Sludge	29.1	15.0104	11807.6	5.08494	29.1	34.108
14	1	2	Sludge	38.8	16.3578	11580.8	5.08494	38.8	29.0538
15	1	2	MAP	9.7	6.68853	8144.33	5.08494	9.7	6.22263
16	1	2	MAP	19.4	8.05753	9436.43	5.08494	19.4	12.2299
17	1	2	MAP	29.1	8.77485	9512.03	5.08494	29.1	11.9928
18	1	2	MAP	38.8	11.8511	12192.4	5.08494	38.8	17.4384
19	1	3	Control	0	5.13515	2996.56
20	1	3	Sludge	9.7	10.5315	11360.8	5.13515	9.7	55.6323
21	1	3	Sludge	19.4	11.7879	11773.2	5.13515	19.4	34.2926
22	1	3	Sludge	29.1	13.6933	12171.8	5.13515	29.1	29.4094
23	1	3	Sludge	38.8	16.7753	13195.9	5.13515	38.8	30.0003
24	1	3	MAP	9.7	6.49553	8343.64	5.13515	9.7	3.71517
25	1	3	MAP	19.4	7.58808	10158.1	5.13515	19.4	10.0666
26	1	3	MAP	29.1	8.37416	9127.15	5.13515	29.1	11.1306
27	1	3	MAP	38.8	10.4913	11168.4	5.13515	38.8	13.8045
28	2	1	Control	0	2.51268	920.962
29	2	1	Sludge	9.7	5.97108	4350.52	2.51268	9.7	35.6536
30	2	1	Sludge	19.4	3.60789	3175.26	2.51268	19.4	5.64539
31	2	1	Sludge	29.1	7.21485	3958.76	2.51268	29.1	16.1586
32	2	1	Sludge	38.8	5.05485	3120.27	2.51268	38.8	6.55197
33	2	1	MAP	9.7	2.50044	3044.67	2.51268	9.7	-0.126209
34	2	1	MAP	19.4	2.75743	3106.53	2.51268	19.4	0.230683
35	2	1	MAP	29.1	3.47729	3917.53	2.51268	29.1	2.86958
36	2	1	MAP	38.8	2.88182	3182.13	2.51268	38.8	0.951383
37	2	2	Control	0	0.83768	783.505
38	2	2	Sludge	9.7	5.04789	3835.05	0.83768	9.7	43.4042
39	2	2	Sludge	19.4	10.0086	5525.77	0.83768	19.4	47.2726
40	2	2	Sludge	29.1	9.72874	4941.58	0.83768	29.1	30.5535
41	2	2	Sludge	38.8	7.92912	4027.49	0.83768	38.8	18.2769
42	2	2	MAP	9.7	2.18051	2274.91	0.83768	9.7	13.8436
43	2	2	MAP	19.4	1.9973	2329.9	0.83768	19.4	5.97744
44	2	2	MAP	29.1	1.75082	2034.36	0.83768	29.1	3.13795
45	2	2	MAP	38.8	3.72837	3670.1	0.83768	38.8	7.45022
46	2	3	Control	0	2.35902	962.199
47	2	3	Sludge	9.7	3.01615	2879.73	2.35902	9.7	6.77455
48	2	3	Sludge	19.4	7.37691	4893.47	2.35902	19.4	23.8035
49	2	3	Sludge	29.1	9.30371	4646.05	2.35902	29.1	23.8649
50	2	3	Sludge	38.8	8.4491	4845.36	2.35902	38.8	15.6961
51	2	3	MAP	9.7	2.29052	2213.06	2.35902	9.7	-0.706239
52	2	3	MAP	19.4	2.48704	2453.61	2.35902	19.4	0.659887
53	2	3	MAP	29.1	3.06671	2975.95	2.35902	29.1	2.43193
54	2	3	MAP	38.8	3.80567	3161.51	2.35902	38.8	3.72848
55	3	1	Control	0	2.13979	1347.08
56	3	1	Sludge	9.7	5.01959	3718.21	2.13979	9.7	29.6886
57	3	1	Sludge	19.4	12.0637	5443.3	2.13979	19.4	51.1542
58	3	1	Sludge	29.1	13.7787	4096.22	2.13979	29.1	38.2779
59	3	1	Sludge	38.8	17.1982	5182.13	2.13979	38.8	38.8103
60	3	1	MAP	9.7	2.28124	2199.31	2.13979	9.7	1.45818
61	3	1	MAP	19.4	2.53706	2467.35	2.13979	19.4	2.04775
62	3	1	MAP	29.1	2.49182	3106.53	2.13979	29.1	2.5843
63	3	1	MAP	38.8	2.40303	2914.09	2.13979	38.8	3.77123
64	3	2	Control	0	2.14491	1216.49
65	3	2	Sludge	9.7	7.0916	5209.62	2.14491	9.7	44.8112
66	3	2	Sludge	19.4	11.3233	4453.61	2.14491	19.4	47.3113
67	3	2	Sludge	29.1	14.3847	4219.93	2.14491	29.1	44.8456
68	3	2	Sludge	38.8	15.4082	5168.38	2.14491	38.8	36.7612
69	3	2	MAP	9.7	2.313	2666.67	2.14491	9.7	0.701961
70	3	2	MAP	19.4	2.21784	2439.86	2.14491	19.4	1.40683
71	3	2	MAP	29.1	2.5582	3202.75	2.14491	29.1	2.7948
72	3	2	MAP	38.8	2.16096	2941.58	2.14491	38.8	2.50306
73	3	3	Control	0	2.24644	1367.7
74	3	3	Sludge	9.7	6.86204	3567.01	2.24644	9.7	37.2742
75	3	3	Sludge	19.4	10.9689	3793.81	2.24644	19.4	44.9609
76	3	3	Sludge	29.1	13.6359	4907.22	2.24644	29.1	40.17
77	3	3	Sludge	38.8	13.8711	4123.71	2.24644	38.8	37.177
78	3	3	MAP	9.7	2.36598	2474.23	2.24644	9.7	0.201403
79	3	3	MAP	19.4	2.60878	3395.19	2.24644	19.4	0.321315
80	3	3	MAP	29.1	2.37713	3044.67	2.24644	29.1	0.449091
81	3	3	MAP	38.8	2.81835	3257.73	2.24644	38.8	0.95851
82	4	1	Control	0	1.0282	1676.98
83	4	1	Sludge	9.7	2.82804	1979.38	1.0282	9.7	6.95472
84	4	1	Sludge	19.4	5.23198	2962.2	1.0282	19.4	18.0608
85	4	1	Sludge	29.1	6.06804	2996.56	1.0282	29.1	13.8826
86	4	1	Sludge	38.8	9.1626	3896.91	1.0282	38.8	20.965
87	4	1	MAP	9.7	1.82997	1663.23	1.0282	9.7	0.0182804
88	4	1	MAP	19.4	1.73389	1718.21	1.0282	19.4	1.57575
89	4	1	MAP	29.1	1.08074	1250.86	1.0282	29.1	0.180572
90	4	1	MAP	38.8	2.08706	1986.25	1.0282	38.8	2.72902
91	4	2	Control	0	1.21106	1560.14
92	4	2	Sludge	9.7	4.00964	2762.89	1.21106	9.7	18.5421
93	4	2	Sludge	19.4	4.6234	3113.4	1.21106	19.4	12.4348
94	4	2	Sludge	29.1	7.31753	3848.8	1.21106	29.1	19.06
95	4	2	Sludge	38.8	6.91747	3305.84	1.21106	38.8	12.7485
96	4	2	MAP	9.7	1.89946	1738.83	1.21106	9.7	1.94226
97	4	2	MAP	19.4	1.58521	1381.44	1.21106	19.4	2.44407
98	4	2	MAP	29.1	1.65619	1443.3	1.21106	29.1	3.24787
99	4	2	MAP	38.8	1.70103	1718.21	1.21106	38.8	4.3556
100	4	3	Control	0	1.36175	1780.07
101	4	3	Sludge	9.7	3.93765	2756.01	1.36175	9.7	17.2773
102	4	3	Sludge	19.4	8.59794	4776.63	1.36175	19.4	37.2999
103	4	3	Sludge	29.1	6.17784	3230.24	1.36175	29.1	16.5501
104	4	3	Sludge	38.8	10.7202	4371.13	1.36175	38.8	24.1197
105	4	3	MAP	9.7	0.604067	597.938	1.36175	9.7	-7.81119
106	4	3	MAP	19.4	2.37006	2123.71	1.36175	19.4	3.65108
107	4	3	MAP	29.1	1.55473	1601.37	1.36175	29.1	0.663168
108	4	3	MAP	38.8	3.36206	3030.93	1.36175	38.8	5.15542

## Sheet: SOIL1-4
S/N	Cycle	Rep	Trt	Rate	TP_mgkgSoil	OlsenP _mgkgSoil
1	1	1	Control	0	567	8.85
2	1	1	Sludge	9.7	564.75	11.6
3	1	1	Sludge	19.4	553.5	9.85
4	1	1	Sludge	29.1	609.75	12.1
5	1	1	Sludge	38.8	555.75	12.725
6	1	1	MAP	9.7	598.5	11.975
7	1	1	MAP	19.4	576	9.475
8	1	1	MAP	29.1	510	8.725
9	1	1	MAP	38.8	587.25	10.475
10	1	2	Control	0	508.5	9.1
11	1	2	Sludge	9.7	535.5	11.35
12	1	2	Sludge	19.4	668.25	12.85
13	1	2	Sludge	29.1	594	14.85
14	1	2	Sludge	38.8	567	15.975
15	1	2	MAP	9.7	643.5	7.475
16	1	2	MAP	19.4	537.75	8.975
17	1	2	MAP	29.1	454.5	31.975
18	1	2	MAP	38.8	576	22.725
19	1	3	Control	0	533.25	16.85
20	1	3	Sludge	9.7	607.5	8.1
21	1	3	Sludge	19.4	600.75	11.975
22	1	3	Sludge	29.1	591.75	14.6
23	1	3	Sludge	38.8	522	18.6
24	1	3	MAP	9.7	495	10.225
25	1	3	MAP	19.4	623.25	10.475
26	1	3	MAP	29.1	483.75	53.6
27	1	3	MAP	38.8	465.75	15.1
28	2	1	Control	0	479.25	40.35
29	2	1	Sludge	9.7	452.25	20.1
30	2	1	Sludge	19.4	600.75	15.85
31	2	1	Sludge	29.1	558	13.225
32	2	1	Sludge	38.8	510.75	20.1
33	2	1	MAP	9.7	420.75	7.1
34	2	1	MAP	19.4	432	12.85
35	2	1	MAP	29.1	546.75	13.85
36	2	1	MAP	38.8	479.25	7.6
37	2	2	Control	0	477	12.35
38	2	2	Sludge	9.7	423	8.475
39	2	2	Sludge	19.4	801	17.85
40	2	2	Sludge	29.1	573.75	19.225
41	2	2	Sludge	38.8	571.5	57.35
42	2	2	MAP	9.7	564.75	22.85
43	2	2	MAP	19.4	456.75	9.225
44	2	2	MAP	29.1	438.75	26.1
45	2	2	MAP	38.8	416.25	58.85
46	2	3	Control	0	506.25	6.975
47	2	3	Sludge	9.7	429.75	17.85
48	2	3	Sludge	19.4	569.25	45.6
49	2	3	Sludge	29.1	526.5	21.975
50	2	3	Sludge	38.8	740.25	27.6
51	2	3	MAP	9.7	380.25	60.975
52	2	3	MAP	19.4	456.75	60.1
53	2	3	MAP	29.1	398.25	58.1
54	2	3	MAP	38.8	483.75	35.725
55	3	1	Control	0	364.5	5.725
56	3	1	Sludge	9.7	438.75	14.475
57	3	1	Sludge	19.4	470.25	10.1
58	3	1	Sludge	29.1	481.5	14.225
59	3	1	Sludge	38.8	461.25	20.6
60	3	1	MAP	9.7	337.5	6.475
61	3	1	MAP	19.4	292.5	9.725
62	3	1	MAP	29.1	438.75	12.35
63	3	1	MAP	38.8	436.5	11.1
64	3	2	Control	0	371.25	6.85
65	3	2	Sludge	9.7	389.25	7.35
66	3	2	Sludge	19.4	371.25	9.85
67	3	2	Sludge	29.1	414	14.975
68	3	2	Sludge	38.8	454.5	17.85
69	3	2	MAP	9.7	330.75	6.225
70	3	2	MAP	19.4	346.5	6.725
71	3	2	MAP	29.1	369	7.225
72	3	2	MAP	38.8	459	26.475
73	3	3	Control	0	364.5	8.6
74	3	3	Sludge	9.7	414	14.725
75	3	3	Sludge	19.4	418.5	19.475
76	3	3	Sludge	29.1	472.5	16.1
77	3	3	Sludge	38.8	438.75	16.225
78	3	3	MAP	9.7	335.25	11.1
79	3	3	MAP	19.4	389.25	13.85
80	3	3	MAP	29.1	398.25	11.975
81	3	3	MAP	38.8	371.25	14.975
82	4	1	Control	0	461.25	9.225
83	4	1	Sludge	9.7	490.5	10.1
84	4	1	Sludge	19.4	513	12.1
85	4	1	Sludge	29.1	483.75	14.725
86	4	1	Sludge	38.8	540	19.725
87	4	1	MAP	9.7	416.25	10.35
88	4	1	MAP	19.4	387	6.975
89	4	1	MAP	29.1	416.25	7.225
90	4	1	MAP	38.8	362.25	9.475
91	4	2	Control	0	420.75	9.1
92	4	2	Sludge	9.7	375.75	5.6
93	4	2	Sludge	19.4	434.25	2.85
94	4	2	Sludge	29.1	452.25	5.85
95	4	2	Sludge	38.8	558	13.1
96	4	2	MAP	9.7	357.75	5.725
97	4	2	MAP	19.4	344.25	9.225
98	4	2	MAP	29.1	396	6.6
99	4	2	MAP	38.8	405	16.35
100	4	3	Control	0	418.5	8.35
101	4	3	Sludge	9.7	378	12.725
102	4	3	Sludge	19.4	427.5	14.1
103	4	3	Sludge	29.1	474.75	12.475
104	4	3	Sludge	38.8	416.25	17.975
105	4	3	MAP	9.7	342	12.725
106	4	3	MAP	19.4	400.5	10.85
107	4	3	MAP	29.1	393.75	9.6
108	4	3	MAP	38.8	402.75	9.6

## Sheet: Root4
trt	Rate	Root yield_mg_kgsoil	P in root_mg_kgsoil	Root Al mg_kgsoil
Control	0	2467.35	2.5898	28.3129
Sludge	9.7	6927.84	9.66433	152.759
Sludge	19.4	9560.14	20.4348	173.158
Sludge	29.1	9058.42	21.6043	136.556
Sludge	38.8	9106.53	28.0709	152.648
MAP	9.7	4797.25	6.15247	69.6201
MAP	19.4	5951.89	7.49938	117.847
MAP	29.1	6460.48	8.88316	127.595
MAP	38.8	6687.29	8.50121	86.5168
Control	0	4302.41	5.56624	67.2789
Sludge	9.7	7621.99	11.7474	81.8888
Sludge	19.4	9725.09	14.5512	158.64
Sludge	29.1	10969.1	24.1868	130.806
Sludge	38.8	8824.74	33.3575	137.004
MAP	9.7	8776.63	9.3504	130.333
MAP	19.4	5862.54	6.85918	76.5062
MAP	29.1	4384.88	5.96892	57.716
MAP	38.8	7752.58	8.32918	130.825
Control	0	4529.21	4.47882	74.9018
Sludge	9.7	12178.7	14.5231	121.939
Sludge	19.4	10941.6	18.587	126.786
Sludge	29.1	6707.9	47.9196	95.0845
Sludge	38.8	13896.9	72.3855	162.594
MAP	9.7	5443.3	6.67485	51.8066
MAP	19.4	11408.9	12.8351	138.619
MAP	29.1	5718.21	6.41369	57.5109
MAP	38.8	5773.2	6.37794	69.4948

## Sheet: AL 1-4
S/N	Cycle	Rep	Trt	Rate	AL_mg_kgsoil
1	1	1	Control	0	0.662381
2	1	1	Sludge	9.7	1.52154
3	1	1	Sludge	19.4	0
4	1	1	Sludge	29.1	0
5	1	1	Sludge	38.8	0
6	1	1	MAP	9.7	0
7	1	1	MAP	19.4	0
8	1	1	MAP	29.1	0
9	1	1	MAP	38.8	0
10	1	2	Control	0	0
11	1	2	Sludge	9.7	0
12	1	2	Sludge	19.4	0
13	1	2	Sludge	29.1	0
14	1	2	Sludge	38.8	0
15	1	2	MAP	9.7	0
16	1	2	MAP	19.4	0
17	1	2	MAP	29.1	0
18	1	2	MAP	38.8	0
19	1	3	Control	0	0
20	1	3	Sludge	9.7	0
21	1	3	Sludge	19.4	0
22	1	3	Sludge	29.1	0
23	1	3	Sludge	38.8	0
24	1	3	MAP	9.7	0
25	1	3	MAP	19.4	0
26	1	3	MAP	29.1	0
27	1	3	MAP	38.8	0
28	2	1	Control	0	0.0437227
29	2	1	Sludge	9.7	0
30	2	1	Sludge	19.4	0
31	2	1	Sludge	29.1	0
32	2	1	Sludge	38.8	0
33	2	1	MAP	9.7	0
34	2	1	MAP	19.4	0
35	2	1	MAP	29.1	0
36	2	1	MAP	38.8	0
37	2	2	Control	0	0
38	2	2	Sludge	9.7	0
39	2	2	Sludge	19.4	0
40	2	2	Sludge	29.1	0
41	2	2	Sludge	38.8	0.127319
42	2	2	MAP	9.7	0
43	2	2	MAP	19.4	0.0744402
44	2	2	MAP	29.1	0
45	2	2	MAP	38.8	0
46	2	3	Control	0	0
47	2	3	Sludge	9.7	0
48	2	3	Sludge	19.4	0.250485
49	2	3	Sludge	29.1	0
50	2	3	Sludge	38.8	0.21368
51	2	3	MAP	9.7	0
52	2	3	MAP	19.4	0
53	2	3	MAP	29.1	0
54	2	3	MAP	38.8	0
55	3	1	Control	0	2.84907
56	3	1	Sludge	9.7	10.7921
57	3	1	Sludge	19.4	4.34784
58	3	1	Sludge	29.1	3.53913
59	3	1	Sludge	38.8	6.12139
60	3	1	MAP	9.7	2.23423
61	3	1	MAP	19.4	2.16788
62	3	1	MAP	29.1	2.22971
63	3	1	MAP	38.8	2.28173
64	3	2	Control	0	3.06557
65	3	2	Sludge	9.7	12.1905
66	3	2	Sludge	19.4	24.9513
67	3	2	Sludge	29.1	2.87694
68	3	2	Sludge	38.8	4.98297
69	3	2	MAP	9.7	9.69
70	3	2	MAP	19.4	2.16294
71	3	2	MAP	29.1	2.63746
72	3	2	MAP	38.8	2.15103
73	3	3	Control	0	1.47865
74	3	3	Sludge	9.7	2.31142
75	3	3	Sludge	19.4	2.24072
76	3	3	Sludge	29.1	4.30608
77	3	3	Sludge	38.8	3.41907
78	3	3	MAP	9.7	3.75773
79	3	3	MAP	19.4	1.94417
80	3	3	MAP	29.1	3.42526
81	3	3	MAP	38.8	1.91677
82	4	1	Control	0	11.4705
83	4	1	Sludge	9.7	9.01856
84	4	1	Sludge	19.4	15.1294
85	4	1	Sludge	29.1	6.43887
86	4	1	Sludge	38.8	11.1793
87	4	1	MAP	9.7	7.18515
88	4	1	MAP	19.4	9.89691
89	4	1	MAP	29.1	6.72649
90	4	1	MAP	38.8	9.56381
91	4	2	Control	0	4.65116
92	4	2	Sludge	9.7	16.194
93	4	2	Sludge	19.4	17.688
94	4	2	Sludge	29.1	21.0433
95	4	2	Sludge	38.8	6.47119
96	4	2	MAP	9.7	2.24961
97	4	2	MAP	19.4	10.9099
98	4	2	MAP	29.1	5.34201
99	4	2	MAP	38.8	14.1495
100	4	3	Control	0	3.20412
101	4	3	Sludge	9.7	31.0052
102	4	3	Sludge	19.4	24.9878
103	4	3	Sludge	29.1	28.3454
104	4	3	Sludge	38.8	17.2113
105	4	3	MAP	9.7	4.70876
106	4	3	MAP	19.4	13.1882
107	4	3	MAP	29.1	15.3312
108	4	3	MAP	38.8	14.8326

## Sheet:  pH and EC
SN	Cycle	Rep	Trt	Rate (mg_kgsoil)	pH	EC (µs/cm)
1	1	1	Control	0	8.079	256.3
2	1	1	Sludge	9.7	7.718	688
3	1	1	Sludge	19.4	7.614	1534
4	1	1	Sludge	29.1	7.888	280.5
5	1	1	Sludge	38.8	7.781	339
6	1	1	MAP	9.7	7.992	321
7	1	1	MAP	19.4	7.967	281.3
8	1	1	MAP	29.1	7.946	311
9	1	1	MAP	38.8	7.966	282.5
10	1	2	Control	0	8.134	209.7
11	1	2	Sludge	9.7	7.747	313
12	1	2	Sludge	19.4	7.751	347
13	1	2	Sludge	29.1	7.876	330
14	1	2	Sludge	38.8	7.927	401
15	1	2	MAP	9.7	7.937	490
16	1	2	MAP	19.4	7.711	1399
17	1	2	MAP	29.1	7.941	2080
18	1	2	MAP	38.8	7.806	477
19	1	3	Control	0	8.135	251.5
20	1	3	Sludge	9.7	7.915	395
21	1	3	Sludge	19.4	7.965	297
22	1	3	Sludge	29.1	7.949	308
23	1	3	Sludge	38.8	7.94	304
24	1	3	MAP	9.7	7.898	547
25	1	3	MAP	19.4	7.878	930
26	1	3	MAP	29.1	7.925	535
27	1	3	MAP	38.8	7.981	300
28	2	1	Control	0	7.872	275.3
29	2	1	Sludge	9.7	6.59	806
30	2	1	Sludge	19.4	6.802	401
31	2	1	Sludge	29.1	7.328	298.9
32	2	1	Sludge	38.8	7.334	377
33	2	1	MAP	9.7	6.479	1702
34	2	1	MAP	19.4	6.794	857
35	2	1	MAP	29.1	6.875	1007
36	2	1	MAP	38.8	7.713	290.9
37	2	2	Control	0	7.87	236.8
38	2	2	Sludge	9.7	6.486	1520
39	2	2	Sludge	19.4	6.616	1200
40	2	2	Sludge	29.1	6.663	736
41	2	2	Sludge	38.8	7.444	338
42	2	2	MAP	9.7	6.854	900
43	2	2	MAP	19.4	7.018	543
44	2	2	MAP	29.1	7.22	431
45	2	2	MAP	38.8	7.04	961
46	2	3	Control	0	7.856	269.2
47	2	3	Sludge	9.7	7.435	321
48	2	3	Sludge	19.4	7.31	342
49	2	3	Sludge	29.1	7.115	380
50	2	3	Sludge	38.8	7.458	242.6
51	2	3	MAP	9.7	6.976	714
52	2	3	MAP	19.4	6.963	524
53	2	3	MAP	29.1	7.076	403
54	2	3	MAP	38.8	7.059	645
55	3	1	Control	0	8.144	247.8
56	3	1	Sludge	9.7	7.65	1204
57	3	1	Sludge	19.4	7.925	665
58	3	1	Sludge	29.1	7.757	926
59	3	1	Sludge	38.8	7.891	606
60	3	1	MAP	9.7	6.463	1266
61	3	1	MAP	19.4	6.125	2084
62	3	1	MAP	29.1	6.329	1420
63	3	1	MAP	38.8	6.519	1174
64	3	2	Control	0	8.12	261.1
65	3	2	Sludge	9.7	7.755	1190
66	3	2	Sludge	19.4	7.982	337
67	3	2	Sludge	29.1	7.803	630
68	3	2	Sludge	38.8	7.872	711
69	3	2	MAP	9.7	6.02	2251
70	3	2	MAP	19.4	6.231	1562
71	3	2	MAP	29.1	6.376	907
72	3	2	MAP	38.8	6.568	867
73	3	3	Control	0	8.074	200
74	3	3	Sludge	9.7	7.757	1067
75	3	3	Sludge	19.4	7.715	1484
76	3	3	Sludge	29.1	7.767	793
77	3	3	Sludge	38.8	7.8	751
78	3	3	MAP	9.7	6.374	1472
79	3	3	MAP	19.4	6.352	1359
80	3	3	MAP	29.1	6.412	1048
81	3	3	MAP	38.8	6.197	1429
82	4	1	Control	0	8.096	270.8
83	4	1	Sludge	9.7	7.388	2183
84	4	1	Sludge	19.4	7.549	1483
85	4	1	Sludge	29.1	7.519	1970
86	4	1	Sludge	38.8	7.547	1307
87	4	1	MAP	9.7	7.55	2898
88	4	1	MAP	19.4	7.51	2891
89	4	1	MAP	29.1	7.621	2065
90	4	1	MAP	38.8	7.507	2571
91	4	2	Control	0	8.101	270.2
92	4	2	Sludge	9.7	7.514	1910
93	4	2	Sludge	19.4	7.635	1650
94	4	2	Sludge	29.1	7.739	1105
95	4	2	Sludge	38.8	7.665	1424
96	4	2	MAP	9.7	7.316	4.4
97	4	2	MAP	19.4	7.551	2809
98	4	2	MAP	29.1	7.526	2664
99	4	2	MAP	38.8	7.558	2263
100	4	3	Control	0	8.155	292.3
101	4	3	Sludge	9.7	7.492	1726
102	4	3	Sludge	19.4	7.711	1818
103	4	3	Sludge	29.1	7.598	1505
104	4	3	Sludge	38.8	7.652	1691
105	4	3	MAP	9.7	7.415	4.17
106	4	3	MAP	19.4	7.611	2755
107	4	3	MAP	29.1	7.537	2970
108	4	3	MAP	38.8	7.513	2285

## Sheet: Calculation
SN	Cycle	Rep	Treatment	Rate	Yield_mgpot	Yield_mg/kgSoil	Yield_gpot	Yield_g/kgsoil	Yield_kgpot	Area of pot m2	Yield mg/m2	Yield g/m2	Yield kg/m2		Al ppm	TP_ppm	Dilution vol	Digestion mass	TPUptake_mg/kg	mass of soil_kg	Al_mgkg	Total AlUptake_mgPot	Total AlUptake_mgkgsoil	Total AlUptake_mgm^-2		Olsen P (ppm)	DF2	DF1	mass of soil	Olsen_P(mgkgSoil)							TP_ppmsoil	dilution vol	digestion mass	TP_mgkgsoil		trt	Rate	Root TP_ppm	Root-P_mgkgYield	P in root_mgPot	P in root_mg/kgsoil	P in root_mgm^-2	Root Yield_mgPot
1	1	1	Control	0	3540	2432.99	3.54	2.43299	0.00354	0.0213852	165535	165.535	0.165535		2.42	19.46	45	0.4	5.32642	1.455	272.25	0.963765	0.662381	45.0668		0.102	6.25	20	1	8.85							2.52	45	0.2	567		Control	0	9.33	1049.62	3.76815	2.5898	176.204	3590
2	1	1	Sludge	9.7	16130	11085.9	16.13	11.0859	0.01613	0.0213852	754259	754.259	0.754259		1.22	9.55	45	0.4	11.9104	1.455	137.25	2.21384	1.52154	103.522		0.124	6.25	20	1	11.6							2.51	45	0.2	564.75		Sludge	9.7	12.4	1395	14.0616	9.66433	657.538	10080
3	1	1	Sludge	19.4	18220	12522.3	18.22	12.5223	0.01822	0.0213852	851990	851.99	0.85199		BDL	10.3	45	0.4	14.5103	1.455	0	0	0	0		0.11	6.25	20	1	9.85							2.46	45	0.2	553.5		Sludge	19.4	19	2137.5	29.7326	20.4348	1390.33	13910
4	1	1	Sludge	29.1	17130	11773.2	17.13	11.7732	0.01713	0.0213852	801020	801.02	0.80102		BDL	10.3	45	0.4	13.6422	1.455	0	0	0	0		0.128	6.25	20	1	12.1							2.71	45	0.2	609.75		Sludge	29.1	21.2	2385	31.4343	21.6043	1469.91	13180
5	1	1	Sludge	38.8	18510	12721.6	18.51	12.7216	0.01851	0.0213852	865550	865.55	0.86555		BDL	12.3	45	0.4	17.6036	1.455	0	0	0	0		0.133	6.25	20	1	12.725							2.47	45	0.2	555.75		Sludge	38.8	27.4	3082.5	40.8431	28.0709	1909.87	13250
6	1	1	MAP	9.7	12000	8247.42	12	8.24742	0.012	0.0213852	561135	561.135	0.561135		BDL	6.81	45	0.4	6.31856	1.455	0	0	0	0		0.127	6.25	20	1	11.975							2.66	45	0.2	598.5		MAP	9.7	11.4	1282.5	8.95185	6.15247	418.6	6980
7	1	1	MAP	19.4	14510	9972.51	14.51	9.97251	0.01451	0.0213852	678505	678.505	0.678505		BDL	7.53	45	0.4	8.44796	1.455	0	0	0	0		0.107	6.25	20	1	9.475							2.56	45	0.2	576		MAP	19.4	11.2	1260	10.9116	7.49938	510.24	8660
8	1	1	MAP	29.1	13980	9608.25	13.98	9.60825	0.01398	0.0213852	653722	653.722	0.653722		BDL	7.61	45	0.4	8.22586	1.455	0	0	0	0		0.101	6.25	20	1	8.725							2.04	50	0.2	510		MAP	29.1	11	1375	12.925	8.88316	604.389	9400
9	1	1	MAP	38.8	16340	11230.2	16.34	11.2302	0.01634	0.0213852	764078	764.078	0.764078		BDL	7.72	45	0.4	9.75346	1.455	0	0	0	0		0.115	6.25	20	1	10.475							2.61	45	0.2	587.25		MAP	38.8	11.3	1271.25	12.3693	8.50121	578.402	9730
10	1	2	Control	0	3970	2728.52	3.97	2.72852	0.00397	0.0213852	185642	185.642	0.185642		BDL	16.565	45	0.4	5.08477	1.455	0	0	0	0		0.104	6.25	20	1	9.1							2.26	45	0.2	508.5		Control	0	11.5	1293.75	8.09887	5.56624	378.713	6260
11	1	2	Sludge	9.7	13430	9230.24	13.43	9.23024	0.01343	0.0213852	628003	628.003	0.628003		BDL	10.5	45	0.4	10.9032	1.455	0	0	0	0		0.122	6.25	20	1	11.35							2.38	45	0.2	535.5		Sludge	9.7	13.7	1541.25	17.0925	11.7474	799.265	11090
12	1	2	Sludge	19.4	17050	11718.2	17.05	11.7182	0.01705	0.0213852	797279	797.279	0.797279		BDL	9.63	45	0.4	12.6952	1.455	0	0	0	0		0.134	6.25	20	1	12.85							2.97	45	0.2	668.25		Sludge	19.4	13.3	1496.25	21.1719	14.5512	990.026	14150
13	1	2	Sludge	29.1	17180	11807.6	17.18	11.8076	0.01718	0.0213852	803358	803.358	0.803358		BDL	11.3	45	0.4	15.0104	1.455	0	0	0	0		0.15	6.25	20	1	14.85							2.64	45	0.2	594		Sludge	29.1	19.6	2205	35.1918	24.1868	1645.61	15960
14	1	2	Sludge	38.8	16850	11580.8	16.85	11.5808	0.01685	0.0213852	787927	787.927	0.787927		BDL	11.3	50	0.4	16.3578	1.455	0	0	0	0		0.159	6.25	20	1	15.975							2.52	45	0.2	567		Sludge	38.8	33.6	3780	48.5352	33.3575	2269.57	12840
15	1	2	MAP	9.7	11850	8144.33	11.85	8.14433	0.01185	0.0213852	554121	554.121	0.554121		BDL	7.3	45	0.4	6.68853	1.455	0	0	0	0		0.091	6.25	20	1	7.475							2.86	45	0.2	643.5		MAP	9.7	9.47	1065.38	13.6048	9.3504	636.179	12770
16	1	2	MAP	19.4	13730	9436.43	13.73	9.43643	0.01373	0.0213852	642032	642.032	0.642032		BDL	7.59	45	0.4	8.05753	1.455	0	0	0	0		0.103	6.25	20	1	8.975							2.39	45	0.2	537.75		MAP	19.4	10.4	1170	9.9801	6.85918	466.682	8530
17	1	2	MAP	29.1	13840	9512.03	13.84	9.51203	0.01384	0.0213852	647175	647.175	0.647175		BDL	8.2	45	0.4	8.77485	1.455	0	0	0	0		0.287	6.25	20	1	31.975							2.02	45	0.2	454.5		MAP	29.1	12.1	1361.25	8.68478	5.96892	406.111	6380
18	1	2	MAP	38.8	17740	12192.4	17.74	12.1924	0.01774	0.0213852	829544	829.544	0.829544		BDL	8.64	45	0.4	11.8511	1.455	0	0	0	0		0.213	6.25	20	1	22.725							2.56	45	0.2	576		MAP	38.8	9.55	1074.38	12.1189	8.32918	566.697	11280
19	1	3	Control	0	4360	2996.56	4.36	2.99656	0.00436	0.0213852	203879	203.879	0.203879		BDL	15.23	45	0.4	5.13424	1.455	0	0	0	0		0.166	6.25	20	1	16.85							2.37	45	0.2	533.25		Control	0	8.79	988.875	6.51669	4.47882	304.728	6590
20	1	3	Sludge	9.7	16530	11360.8	16.53	11.3608	0.01653	0.0213852	772963	772.963	0.772963		BDL	8.24	45	0.4	10.5315	1.455	0	0	0	0		0.096	6.25	20	1	8.1							2.7	45	0.2	607.5		Sludge	9.7	10.6	1192.5	21.1311	14.5231	988.116	17720
21	1	3	Sludge	19.4	17130	11773.2	17.13	11.7732	0.01713	0.0213852	801020	801.02	0.80102		BDL	8.9	45	0.4	11.7879	1.455	0	0	0	0		0.127	6.25	20	1	11.975							2.67	45	0.2	600.75		Sludge	19.4	15.1	1698.75	27.0441	18.587	1264.62	15920
22	1	3	Sludge	29.1	17710	12171.8	17.71	12.1718	0.01771	0.0213852	828141	828.141	0.828141		BDL	10	45	0.4	13.6933	1.455	0	0	0	0		0.148	6.25	20	1	14.6							2.63	45	0.2	591.75		Sludge	29.1	63.5	7143.75	69.723	47.9196	3260.33	9760
23	1	3	Sludge	38.8	19200	13195.9	19.2	13.1959	0.0192	0.0213852	897816	897.816	0.897816		BDL	11.3	45	0.4	16.7753	1.455	0	0	0	0		0.18	6.25	20	1	18.6							2.32	45	0.2	522		Sludge	38.8	46.3	5208.75	105.321	72.3855	4924.94	20220
24	1	3	MAP	9.7	12140	8343.64	12.14	8.34364	0.01214	0.0213852	567681	567.681	0.567681		BDL	6.92	45	0.4	6.49553	1.455	0	0	0	0		0.113	6.25	20	1	10.225							2.2	45	0.2	495		MAP	9.7	10.9	1226.25	9.7119	6.67485	454.14	7920
25	1	3	MAP	19.4	14780	10158.1	14.78	10.1581	0.01478	0.0213852	691131	691.131	0.691131		BDL	6.64	45	0.4	7.58808	1.455	0	0	0	0		0.115	6.25	20	1	10.475							2.77	45	0.2	623.25		MAP	19.4	10	1125	18.675	12.8351	873.266	16600
26	1	3	MAP	29.1	13280	9127.15	13.28	9.12715	0.01328	0.0213852	620989	620.989	0.620989		BDL	7.34	50	0.4	8.37416	1.455	0	0	0	0		0.46	6.25	20	1	53.6							2.15	45	0.2	483.75		MAP	29.1	9.97	1121.62	9.33192	6.41369	436.372	8320
27	1	3	MAP	38.8	16250	11168.4	16.25	11.1684	0.01625	0.0213852	759870	759.87	0.75987		BDL	8.35	45	0.4	10.4913	1.455	0	0	0	0		0.152	6.25	20	1	15.1							2.07	45	0.2	465.75		MAP	38.8	9.82	1104.75	9.2799	6.37794	433.94	8400
28	2	1	Control	0	1340	920.962	1.34	0.920962	0.00134	0.0213852	62660	62.66	0.06266		0.422	24.25	45	0.4	2.5125	1.435	47.475	0.0636165	0.0437227	2.97479		0.354	6.25	20	1	40.35							2.13	45	0.2	479.25
29	2	1	Sludge	9.7	6330	4350.52	6.33	4.35052	0.00633	0.0213852	295999	295.999	0.295999		BDL	12.2	45	0.4	5.97108	1.435	0	0	0	0		0.192	6.25	20	1	20.1							2.01	45	0.2	452.25
30	2	1	Sludge	19.4	4620	3175.26	4.62	3.17526	0.00462	0.0213852	216037	216.037	0.216037		BDL	10.1	45	0.4	3.60789	1.435	0	0	0	0		0.158	6.25	20	1	15.85							2.67	45	0.2	600.75
31	2	1	Sludge	29.1	5760	3958.76	5.76	3.95876	0.00576	0.0213852	269345	269.345	0.269345		BDL	16.2	45	0.4	7.21485	1.435	0	0	0	0		0.137	6.25	20	1	13.225							2.48	45	0.2	558
32	2	1	Sludge	38.8	4540	3120.27	4.54	3.12027	0.00454	0.0213852	212296	212.296	0.212296		BDL	14.4	45	0.4	5.05485	1.435	0	0	0	0		0.192	6.25	20	1	20.1							2.27	45	0.2	510.75
33	2	1	MAP	9.7	4430	3044.67	4.43	3.04467	0.00443	0.0213852	207152	207.152	0.207152		BDL	7.3	45	0.4	2.50044	1.435	0	0	0	0		0.088	6.25	20	1	7.1							1.87	45	0.2	420.75
34	2	1	MAP	19.4	4520	3106.53	4.52	3.10653	0.00452	0.0213852	211361	211.361	0.211361		BDL	7.89	45	0.4	2.75743	1.435	0	0	0	0		0.134	6.25	20	1	12.85							1.92	45	0.2	432
35	2	1	MAP	29.1	5700	3917.53	5.7	3.91753	0.0057	0.0213852	266539	266.539	0.266539		BDL	7.89	45	0.4	3.47729	1.435	0	0	0	0		0.142	6.25	20	1	13.85							2.43	45	0.2	546.75
36	2	1	MAP	38.8	4630	3182.13	4.63	3.18213	0.00463	0.0213852	216504	216.504	0.216504		BDL	8.05	45	0.4	2.88182	1.435	0	0	0	0		0.092	6.25	20	1	7.6							2.13	45	0.2	479.25
37	2	2	Control	0	1140	783.505	1.14	0.783505	0.00114	0.0213852	53307.8	53.3078	0.0533078		BDL	9.5	45	0.4	0.837371	1.435	0	0	0	0		0.13	6.25	20	1	12.35							2.12	45	0.2	477
38	2	2	Sludge	9.7	5580	3835.05	5.58	3.83505	0.00558	0.0213852	260928	260.928	0.260928		BDL	11.7	45	0.4	5.04789	1.435	0	0	0	0		0.099	6.25	20	1	8.475							1.88	45	0.2	423
39	2	2	Sludge	19.4	8040	5525.77	8.04	5.52577	0.00804	0.0213852	375960	375.96	0.37596		BDL	16.1	45	0.4	10.0086	1.435	0	0	0	0		0.174	6.25	20	1	17.85							3.56	45	0.2	801
40	2	2	Sludge	29.1	7190	4941.58	7.19	4.94158	0.00719	0.0213852	336213	336.213	0.336213		BDL	17.5	45	0.4	9.72874	1.435	0	0	0	0		0.185	6.25	20	1	19.225							2.55	45	0.2	573.75
41	2	2	Sludge	38.8	5860	4027.49	5.86	4.02749	0.00586	0.0213852	274021	274.021	0.274021		0.281	17.5	45	0.4	7.92912	1.435	31.6125	0.185249	0.127319	8.66248		0.49	6.25	20	1	57.35							2.54	45	0.2	571.5
42	2	2	MAP	9.7	3310	2274.91	3.31	2.27491	0.00331	0.0213852	154780	154.78	0.15478		BDL	8.52	45	0.4	2.18051	1.435	0	0	0	0		0.214	6.25	20	1	22.85							2.51	45	0.2	564.75
43	2	2	MAP	19.4	3390	2329.9	3.39	2.3299	0.00339	0.0213852	158521	158.521	0.158521		0.284	7.62	45	0.4	1.9973	1.435	31.95	0.10831	0.0744402	5.06473		0.105	6.25	20	1	9.225							2.03	45	0.2	456.75
44	2	2	MAP	29.1	2960	2034.36	2.96	2.03436	0.00296	0.0213852	138413	138.413	0.138413		BDL	7.65	45	0.4	1.75082	1.435	0	0	0	0		0.24	6.25	20	1	26.1							1.95	45	0.2	438.75
45	2	2	MAP	38.8	5340	3670.1	5.34	3.6701	0.00534	0.0213852	249705	249.705	0.249705		BDL	9.03	45	0.4	3.72837	1.435	0	0	0	0		0.502	6.25	20	1	58.85							1.85	45	0.2	416.25
46	2	3	Control	0	1400	962.199	1.4	0.962199	0.0014	0.0213852	65465.7	65.4657	0.0654657		BDL	21.79	45	0.4	2.35871	1.435	0	0	0	0		0.087	6.25	20	1	6.975							2.25	45	0.2	506.25
47	2	3	Sludge	9.7	4190	2879.73	4.19	2.87973	0.00419	0.0213852	195930	195.93	0.19593		BDL	9.31	45	0.4	3.01615	1.435	0	0	0	0		0.174	6.25	20	1	17.85							1.91	45	0.2	429.75
48	2	3	Sludge	19.4	7120	4893.47	7.12	4.89347	0.00712	0.0213852	332940	332.94	0.33294		0.455	13.4	45	0.4	7.37691	1.435	51.1875	0.364455	0.250485	17.0424		0.396	6.25	20	1	45.6							2.53	45	0.2	569.25
49	2	3	Sludge	29.1	6760	4646.05	6.76	4.64605	0.00676	0.0213852	316106	316.106	0.316106		BDL	17.8	45	0.4	9.30371	1.435	0	0	0	0		0.207	6.25	20	1	21.975							2.34	45	0.2	526.5
50	2	3	Sludge	38.8	7050	4845.36	7.05	4.84536	0.00705	0.0213852	329667	329.667	0.329667		0.392	15.5	45	0.4	8.4491	1.435	44.1	0.310905	0.21368	14.5383		0.252	6.25	20	1	27.6							3.29	45	0.2	740.25
51	2	3	MAP	9.7	3220	2213.06	3.22	2.21306	0.00322	0.0213852	150571	150.571	0.150571		BDL	9.2	45	0.4	2.29052	1.435	0	0	0	0		0.519	6.25	20	1	60.975							1.69	45	0.2	380.25
52	2	3	MAP	19.4	3570	2453.61	3.57	2.45361	0.00357	0.0213852	166938	166.938	0.166938		BDL	9.01	45	0.4	2.48704	1.435	0	0	0	0		0.512	6.25	20	1	60.1							2.03	45	0.2	456.75
53	2	3	MAP	29.1	4330	2975.95	4.33	2.97595	0.00433	0.0213852	202476	202.476	0.202476		BDL	9.16	45	0.4	3.06671	1.435	0	0	0	0		0.496	6.25	20	1	58.1							1.77	45	0.2	398.25
54	2	3	MAP	38.8	4600	3161.51	4.6	3.16151	0.0046	0.0213852	215102	215.102	0.215102		BDL	10.7	45	0.4	3.80567	1.435	0	0	0	0		0.317	6.25	20	1	35.725							2.15	45	0.2	483.75
55	3	1	Control	0	1960	1347.08	1.96	1.34708	0.00196	0.0213852	91652	91.652	0.091652		18.8	14.12	45	0.4	2.13984	1.415	2115	4.1454	2.84907	193.844		0.077	6.25	20	1	5.725							1.62	45	0.2	364.5	0
56	3	1	Sludge	9.7	5410	3718.21	5.41	3.71821	0.00541	0.0213852	252978	252.978	0.252978		25.8	12	45	0.4	5.01959	1.415	2902.5	15.7025	10.7921	734.269		0.147	6.25	20	1	14.475							1.95	45	0.2	438.75
57	3	1	Sludge	19.4	7920	5443.3	7.92	5.4433	0.00792	0.0213852	370349	370.349	0.370349		7.1	19.7	45	0.4	12.0637	1.415	798.75	6.3261	4.34784	295.816		0.112	6.25	20	1	10.1							2.09	45	0.2	470.25
58	3	1	Sludge	29.1	5960	4096.22	5.96	4.09622	0.00596	0.0213852	278697	278.697	0.278697		7.68	29.9	45	0.4	13.7787	1.415	864	5.14944	3.53913	240.794		0.145	6.25	20	1	14.225							2.14	45	0.2	481.5
59	3	1	Sludge	38.8	7540	5182.13	7.54	5.18213	0.00754	0.0213852	352580	352.58	0.35258		10.5	29.5	45	0.4	17.1982	1.415	1181.25	8.90663	6.12139	416.485		0.196	6.25	20	1	20.6							2.05	45	0.2	461.25
60	3	1	MAP	9.7	3200	2199.31	3.2	2.19931	0.0032	0.0213852	149636	149.636	0.149636		9.03	9.22	45	0.4	2.28124	1.415	1015.87	3.2508	2.23423	152.011		0.083	6.25	20	1	6.475							1.5	45	0.2	337.5
61	3	1	MAP	19.4	3590	2467.35	3.59	2.46735	0.00359	0.0213852	167873	167.873	0.167873		7.81	9.14	45	0.4	2.53706	1.415	878.625	3.15426	2.16788	147.497		0.109	6.25	20	1	9.725							1.3	45	0.2	292.5
62	3	1	MAP	29.1	4520	3106.53	4.52	3.10653	0.00452	0.0213852	211361	211.361	0.211361		6.38	7.13	45	0.4	2.49182	1.415	717.75	3.24423	2.22971	151.704		0.13	6.25	20	1	12.35							1.95	45	0.2	438.75
63	3	1	MAP	38.8	4240	2914.09	4.24	2.91409	0.00424	0.0213852	198268	198.268	0.198268		6.96	7.33	45	0.4	2.40303	1.415	783	3.31992	2.28173	155.244		0.12	6.25	20	1	11.1							1.94	45	0.2	436.5
64	3	2	Control	0	1770	1216.49	1.77	1.21649	0.00177	0.0213852	82767.4	82.7674	0.0827674		22.4	15.67	45	0.4	2.14453	1.415	2520	4.4604	3.06557	208.574		0.086	6.25	20	1	6.85							1.65	45	0.2	371.25
65	3	2	Sludge	9.7	7580	5209.62	7.58	5.20962	0.00758	0.0213852	354450	354.45	0.35445		20.8	12.1	45	0.4	7.0916	1.415	2340	17.7372	12.1905	829.413		0.09	6.25	20	1	7.35							1.73	45	0.2	389.25
66	3	2	Sludge	19.4	6480	4453.61	6.48	4.45361	0.00648	0.0213852	303013	303.013	0.303013		49.8	22.6	45	0.4	11.3233	1.415	5602.5	36.3042	24.9513	1697.63		0.11	6.25	20	1	9.85							1.65	45	0.2	371.25
67	3	2	Sludge	29.1	6140	4219.93	6.14	4.21993	0.00614	0.0213852	287114	287.114	0.287114		6.06	30.3	45	0.4	14.3847	1.415	681.75	4.18594	2.87694	195.74		0.151	6.25	20	1	14.975							1.84	45	0.2	414
68	3	2	Sludge	38.8	7520	5168.38	7.52	5.16838	0.00752	0.0213852	351644	351.644	0.351644		8.57	26.5	45	0.4	15.4082	1.415	964.125	7.25022	4.98297	339.029		0.174	6.25	20	1	17.85							2.02	45	0.2	454.5
69	3	2	MAP	9.7	3880	2666.67	3.88	2.66667	0.00388	0.0213852	181434	181.434	0.181434		32.3	7.71	45	0.4	2.313	1.415	3633.75	14.0989	9.69	659.284		0.081	6.25	20	1	6.225							1.47	45	0.2	330.75
70	3	2	MAP	19.4	3550	2439.86	3.55	2.43986	0.00355	0.0213852	166002	166.002	0.166002		7.88	8.08	45	0.4	2.21784	1.415	886.5	3.14707	2.16294	147.161		0.085	6.25	20	1	6.725							1.54	45	0.2	346.5
71	3	2	MAP	29.1	4660	3202.75	4.66	3.20275	0.00466	0.0213852	217907	217.907	0.217907		7.32	7.1	45	0.4	2.5582	1.415	823.5	3.83751	2.63746	179.447		0.089	6.25	20	1	7.225							1.64	45	0.2	369
72	3	2	MAP	38.8	4280	2941.58	4.28	2.94158	0.00428	0.0213852	200138	200.138	0.200138		6.5	6.53	45	0.4	2.16096	1.415	731.25	3.12975	2.15103	146.351		0.243	6.25	20	1	26.475							2.04	45	0.2	459
73	3	3	Control	0	1990	1367.7	1.99	1.3677	0.00199	0.0213852	93054.8	93.0548	0.0930548		9.61	14.6	45	0.4	2.24644	1.415	1081.12	2.15144	1.47865	100.604		0.1	6.25	20	1	8.6							1.62	45	0.2	364.5
74	3	3	Sludge	9.7	5190	3567.01	5.19	3.56701	0.00519	0.0213852	242691	242.691	0.242691		5.76	17.1	45	0.4	6.86204	1.415	648	3.36312	2.31142	157.264		0.149	6.25	20	1	14.725							1.84	45	0.2	414
75	3	3	Sludge	19.4	5520	3793.81	5.52	3.79381	0.00552	0.0213852	258122	258.122	0.258122		5.25	25.7	45	0.4	10.9689	1.415	590.625	3.26025	2.24072	152.453		0.187	6.25	20	1	19.475							1.86	45	0.2	418.5
76	3	3	Sludge	29.1	7140	4907.22	7.14	4.90722	0.00714	0.0213852	333875	333.875	0.333875		7.8	24.7	45	0.4	13.6359	1.415	877.5	6.26535	4.30608	292.975		0.16	6.25	20	1	16.1							2.1	45	0.2	472.5
77	3	3	Sludge	38.8	6000	4123.71	6	4.12371	0.006	0.0213852	280567	280.567	0.280567		7.37	29.9	45	0.4	13.8711	1.415	829.125	4.97475	3.41907	232.625		0.161	6.25	20	1	16.225							1.95	45	0.2	438.75
78	3	3	MAP	9.7	3600	2474.23	3.6	2.47423	0.0036	0.0213852	168340	168.34	0.16834		13.5	8.5	45	0.4	2.36598	1.415	1518.75	5.4675	3.75773	255.667		0.12	6.25	20	1	11.1							1.49	45	0.2	335.25
79	3	3	MAP	19.4	4940	3395.19	4.94	3.39519	0.00494	0.0213852	231000	231	0.231		5.09	6.83	45	0.4	2.60878	1.415	572.625	2.82877	1.94417	132.277		0.142	6.25	20	1	13.85							1.73	45	0.2	389.25
80	3	3	MAP	29.1	4430	3044.67	4.43	3.04467	0.00443	0.0213852	207152	207.152	0.207152		10	6.94	45	0.4	2.37713	1.415	1125	4.98375	3.42526	233.046		0.127	6.25	20	1	11.975							1.77	45	0.2	398.25
81	3	3	MAP	38.8	4740	3257.73	4.74	3.25773	0.00474	0.0213852	221648	221.648	0.221648		5.23	7.69	45	0.4	2.81835	1.415	588.375	2.7889	1.91677	130.412		0.151	6.25	20	1	14.975							1.65	45	0.2	371.25
82	4	1	Control	0	2440	1676.98	2.44	1.67698	0.00244	0.0213852	114097	114.097	0.114097		60.8	5.45	45	0.4	1.0282	1.395	6840	16.6896	11.4705	780.426		0.105	6.25	20	1	9.225							2.05	45	0.2	461.25
83	4	1	Sludge	9.7	2880	1979.38	2.88	1.97938	0.00288	0.0213852	134672	134.672	0.134672		40.5	12.7	45	0.4	2.82804	1.395	4556.25	13.122	9.01856	613.601		0.112	6.25	20	1	10.1							2.18	45	0.2	490.5
84	4	1	Sludge	19.4	4310	2962.2	4.31	2.9622	0.00431	0.0213852	201541	201.541	0.201541		45.4	15.7	45	0.4	5.23198	1.395	5107.5	22.0133	15.1294	1029.37		0.128	6.25	20	1	12.1							2.28	45	0.2	513
85	4	1	Sludge	29.1	4360	2996.56	4.36	2.99656	0.00436	0.0213852	203879	203.879	0.203879		19.1	18	45	0.4	6.06804	1.395	2148.75	9.36855	6.43887	438.085		0.149	6.25	20	1	14.725							2.15	45	0.2	483.75
86	4	1	Sludge	38.8	5670	3896.91	5.67	3.89691	0.00567	0.0213852	265136	265.136	0.265136		25.5	20.9	45	0.4	9.1626	1.395	2868.75	16.2658	11.1793	760.609		0.189	6.25	20	1	19.725							2.4	45	0.2	540
87	4	1	MAP	9.7	2420	1663.23	2.42	1.66323	0.00242	0.0213852	113162	113.162	0.113162		38.4	9.78	45	0.4	1.82997	1.395	4320	10.4544	7.18515	488.861		0.114	6.25	20	1	10.35							1.85	45	0.2	416.25
88	4	1	MAP	19.4	2500	1718.21	2.5	1.71821	0.0025	0.0213852	116903	116.903	0.116903		51.2	8.97	45	0.4	1.73389	1.395	5760	14.4	9.89691	673.362		0.087	6.25	20	1	6.975							1.72	45	0.2	387
89	4	1	MAP	29.1	1820	1250.86	1.82	1.25086	0.00182	0.0213852	85105.4	85.1054	0.0851054		47.8	7.68	45	0.4	1.08074	1.395	5377.5	9.78705	6.72649	457.654		0.089	6.25	20	1	7.225							1.85	45	0.2	416.25
90	4	1	MAP	38.8	2890	1986.25	2.89	1.98625	0.00289	0.0213852	135140	135.14	0.13514		42.8	9.34	45	0.4	2.08706	1.395	4815	13.9154	9.56381	650.699		0.107	6.25	20	1	9.475							1.61	45	0.2	362.25
91	4	2	Control	0	2270	1560.14	2.27	1.56014	0.00227	0.0213852	106148	106.148	0.106148		26.5	6.9	45	0.4	1.21106	1.395	2981.25	6.76744	4.65116	316.454		0.104	6.25	20	1	9.1							1.87	45	0.2	420.75
92	4	2	Sludge	9.7	4020	2762.89	4.02	2.76289	0.00402	0.0213852	187980	187.98	0.18798		52.1	12.9	45	0.4	4.00964	1.395	5861.25	23.5622	16.194	1101.8		0.076	6.25	20	1	5.6							1.67	45	0.2	375.75
93	4	2	Sludge	19.4	4530	3113.4	4.53	3.1134	0.00453	0.0213852	211828	211.828	0.211828		50.5	13.2	45	0.4	4.6234	1.395	5681.25	25.7361	17.688	1203.45		0.054	6.25	20	1	2.85							1.93	45	0.2	434.25
94	4	2	Sludge	29.1	5600	3848.8	5.6	3.8488	0.0056	0.0213852	261863	261.863	0.261863		48.6	16.9	45	0.4	7.31753	1.395	5467.5	30.618	21.0433	1431.74		0.078	6.25	20	1	5.85							2.01	45	0.2	452.25
95	4	2	Sludge	38.8	4810	3305.84	4.81	3.30584	0.00481	0.0213852	224922	224.922	0.224922		17.4	18.6	45	0.4	6.91747	1.395	1957.5	9.41557	6.47119	440.284		0.136	6.25	20	1	13.1							2.48	45	0.2	558
96	4	2	MAP	9.7	2530	1738.83	2.53	1.73883	0.00253	0.0213852	118306	118.306	0.118306		11.5	9.71	45	0.4	1.89946	1.395	1293.75	3.27319	2.24961	153.058		0.077	6.25	20	1	5.725							1.59	45	0.2	357.75
97	4	2	MAP	19.4	2010	1381.44	2.01	1.38144	0.00201	0.0213852	93990.1	93.9901	0.0939901		70.2	10.2	45	0.4	1.58521	1.395	7897.5	15.874	10.9099	742.287		0.105	6.25	20	1	9.225							1.53	45	0.2	344.25
98	4	2	MAP	29.1	2100	1443.3	2.1	1.4433	0.0021	0.0213852	98198.6	98.1986	0.0981986		32.9	10.2	45	0.4	1.65619	1.395	3701.25	7.77263	5.34201	363.458		0.084	6.25	20	1	6.6							1.76	45	0.2	396
99	4	2	MAP	38.8	2500	1718.21	2.5	1.71821	0.0025	0.0213852	116903	116.903	0.116903		73.2	8.8	45	0.4	1.70103	1.395	8235	20.5875	14.1495	962.697		0.162	6.25	20	1	16.35							1.8	45	0.2	405
100	4	3	Control	0	2590	1780.07	2.59	1.78007	0.00259	0.0213852	121112	121.112	0.121112		16	6.8	45	0.4	1.36175	1.395	1800	4.662	3.20412	218.001		0.098	6.25	20	1	8.35							1.86	45	0.2	418.5
101	4	3	Sludge	9.7	4010	2756.01	4.01	2.75601	0.00401	0.0213852	187513	187.513	0.187513		100	12.7	45	0.4	3.93765	1.395	11250	45.1125	31.0052	2109.52		0.133	6.25	20	1	12.725							1.68	45	0.2	378
102	4	3	Sludge	19.4	6950	4776.63	6.95	4.77663	0.00695	0.0213852	324991	324.991	0.324991		46.5	16	45	0.4	8.59794	1.395	5231.25	36.3572	24.9878	1700.11		0.144	6.25	20	1	14.1							1.9	45	0.2	427.5
103	4	3	Sludge	29.1	4700	3230.24	4.7	3.23024	0.0047	0.0213852	219778	219.778	0.219778		78	17	45	0.4	6.17784	1.395	8775	41.2425	28.3454	1928.55		0.131	6.25	20	1	12.475							2.11	45	0.2	474.75
104	4	3	Sludge	38.8	6360	4371.13	6.36	4.37113	0.00636	0.0213852	297401	297.401	0.297401		35	21.8	45	0.4	10.7202	1.395	3937.5	25.0425	17.2113	1171.02		0.175	6.25	20	1	17.975							1.85	45	0.2	416.25
105	4	3	MAP	9.7	870	597.938	0.87	0.597938	0.00087	0.0213852	40682.3	40.6823	0.0406823		70	8.98	45	0.4	0.604067	1.395	7875	6.85125	4.70876	320.373		0.133	6.25	20	1	12.725							1.52	45	0.2	342
106	4	3	MAP	19.4	3090	2123.71	3.09	2.12371	0.00309	0.0213852	144492	144.492	0.144492		55.2	9.92	45	0.4	2.37006	1.395	6210	19.1889	13.1882	897.297		0.118	6.25	20	1	10.85							1.78	45	0.2	400.5
107	4	3	MAP	29.1	2330	1601.37	2.33	1.60137	0.00233	0.0213852	108954	108.954	0.108954		85.1	8.63	45	0.4	1.55473	1.395	9573.75	22.3068	15.3312	1043.1		0.108	6.25	20	1	9.6							1.75	45	0.2	393.75
108	4	3	MAP	38.8	4410	3030.93	4.41	3.03093	0.00441	0.0213852	206217	206.217	0.206217		43.5	9.86	45	0.4	3.36206	1.395	4893.75	21.5814	14.8326	1009.17		0.108	6.25	20	1	9.6							1.79	45	0.2	402.75
																							0		Ave. Blank	0.039	5	20	1	0
[truncated: 17 more columns]
